# Supplementary material for: Chemical components from the haulm of Artemisia selengensis and the inhibitory effect on glycation of β-lactoglobulin
Source: Royal Society of Chemistry journal article supplement (doi:10.1039/c5fo00117j), 2015-01-01

*Artemisia Selengensis* Haulm

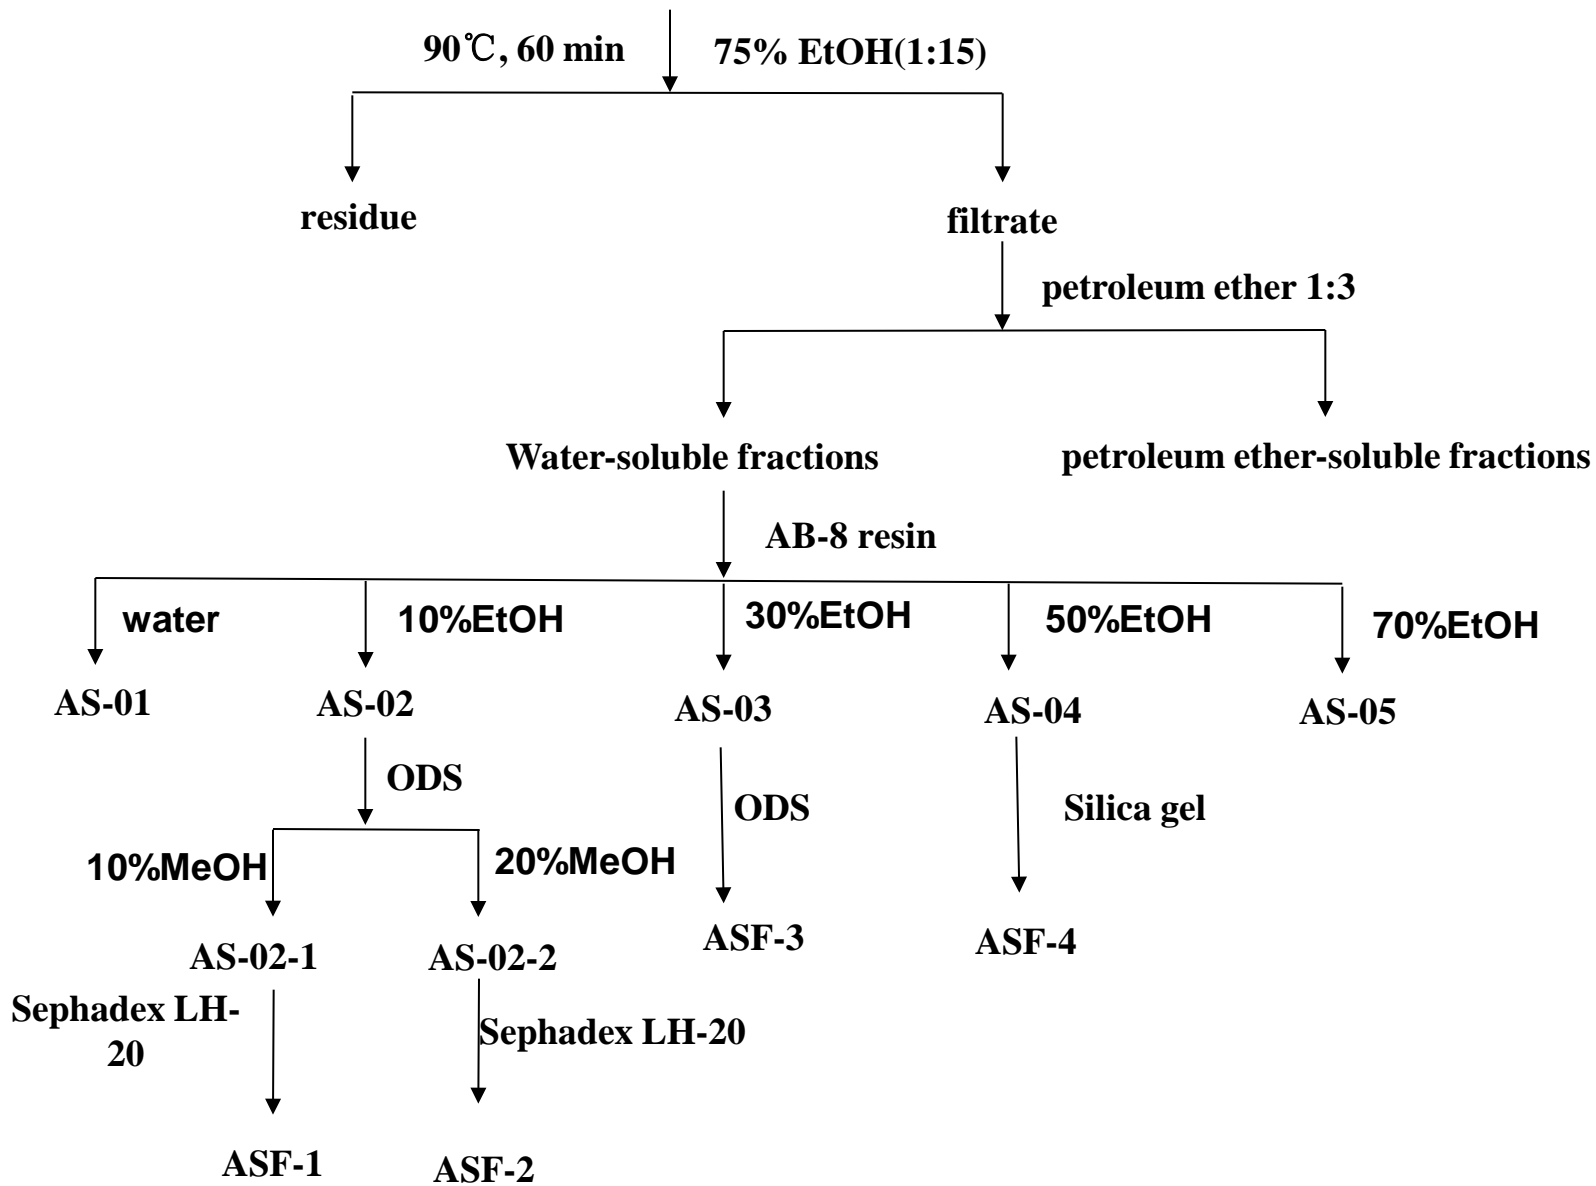

Supplemental Figure 1 Procedure of purification

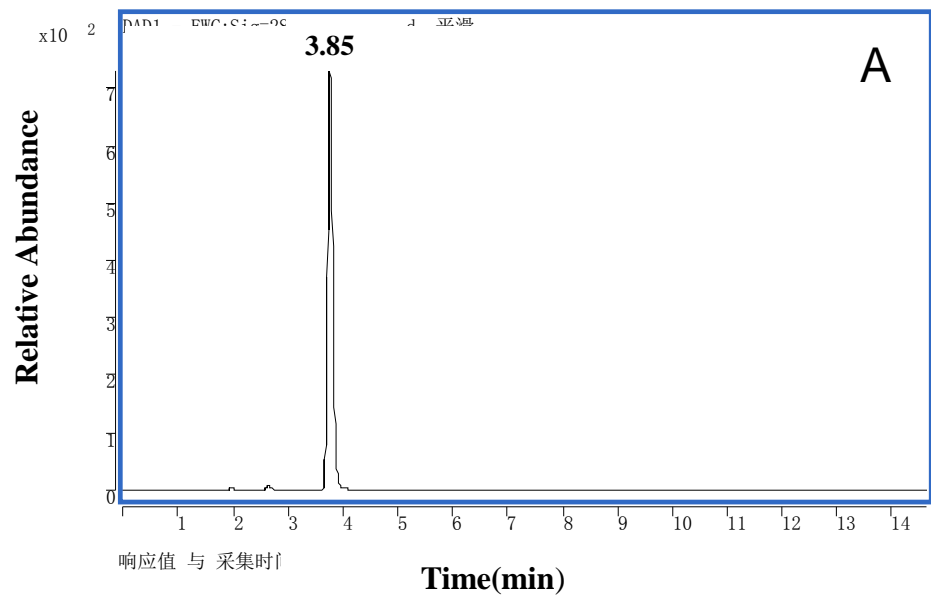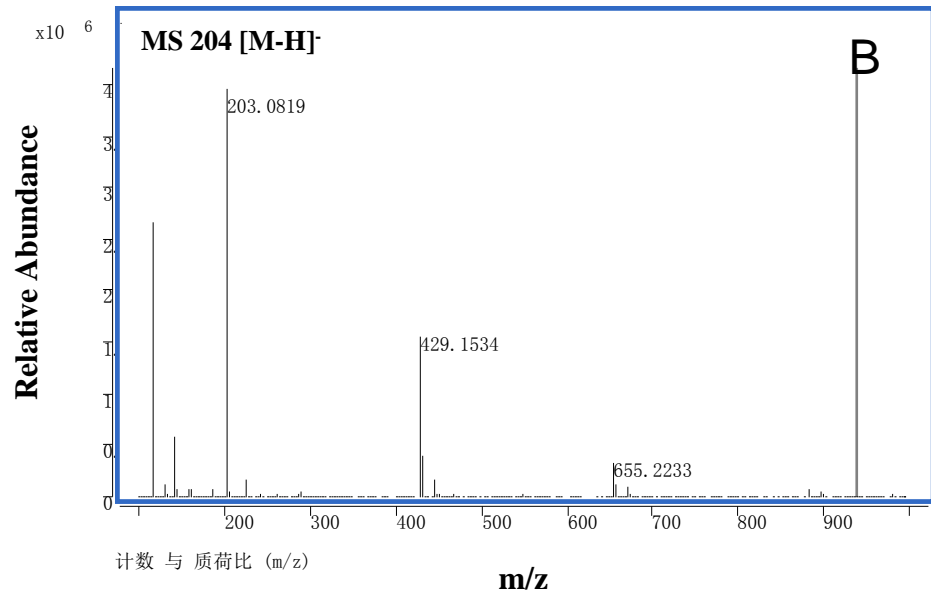

Supplemental Figure 2 HPLC-HRMS Spectrum of ASF-1

10-10-3 1H U20 BRUKER AV400 05, 12, 2012

ppm

7.62791  
7.60792  
7.43304  
7.41277  
7.19566  
7.17072  
7.15050  
7.08692  
7.06775  
4.69144  
3.94828  
3.93547  
3.92850  
3.91635  
3.39348  
3.38168  
3.35518  
3.34341  
3.21362  
3.19342  
3.17532  
3.15511

Integrals

1.0334  
1.0000  
2.0244  
1.1014

1.0305  
1.0724  
1.0840

ppm

9

8

7

6

5

4

3

2

1

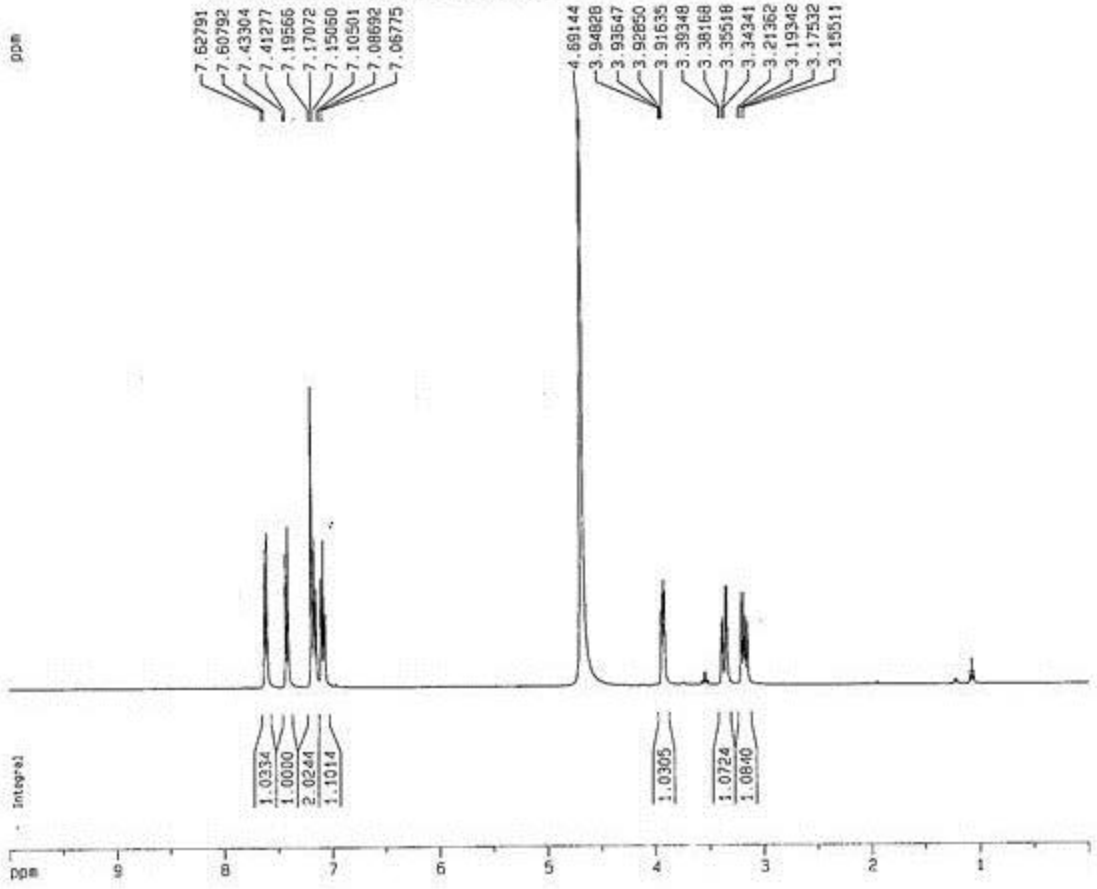

10-10-3 13C D2O BRUKER AV400 06.12.2012

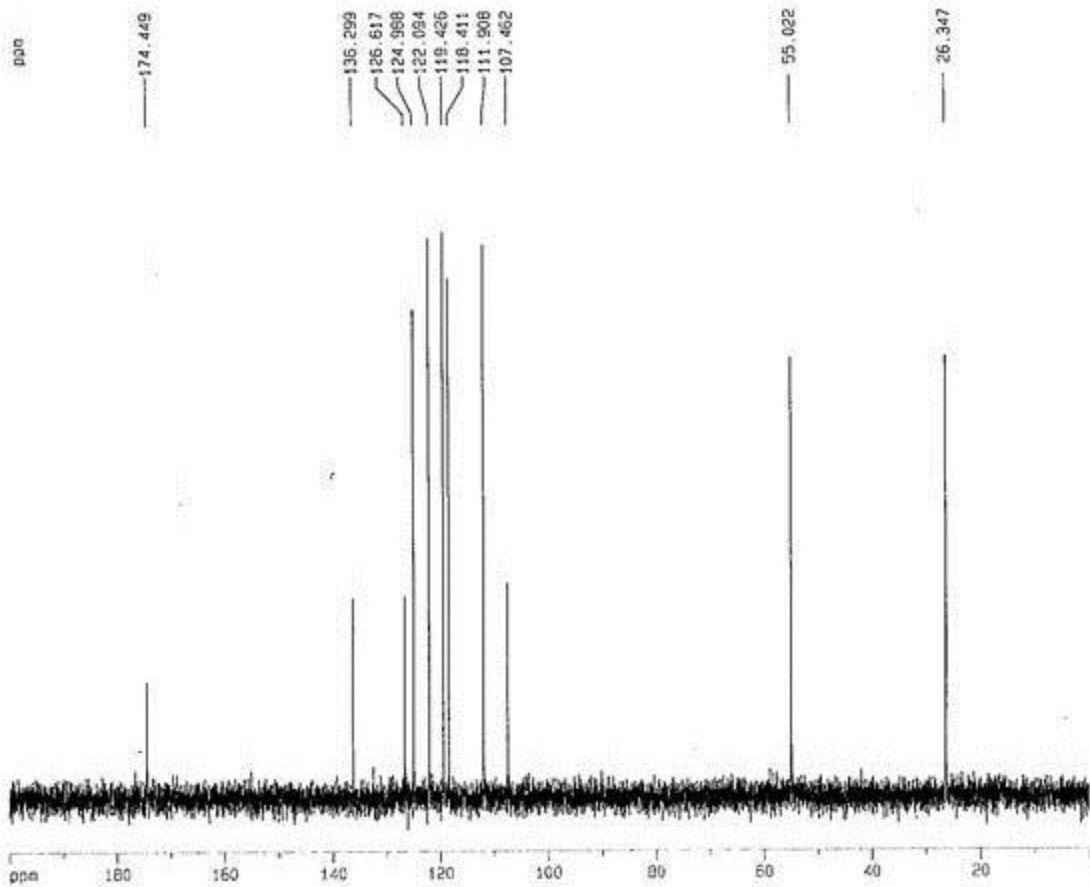

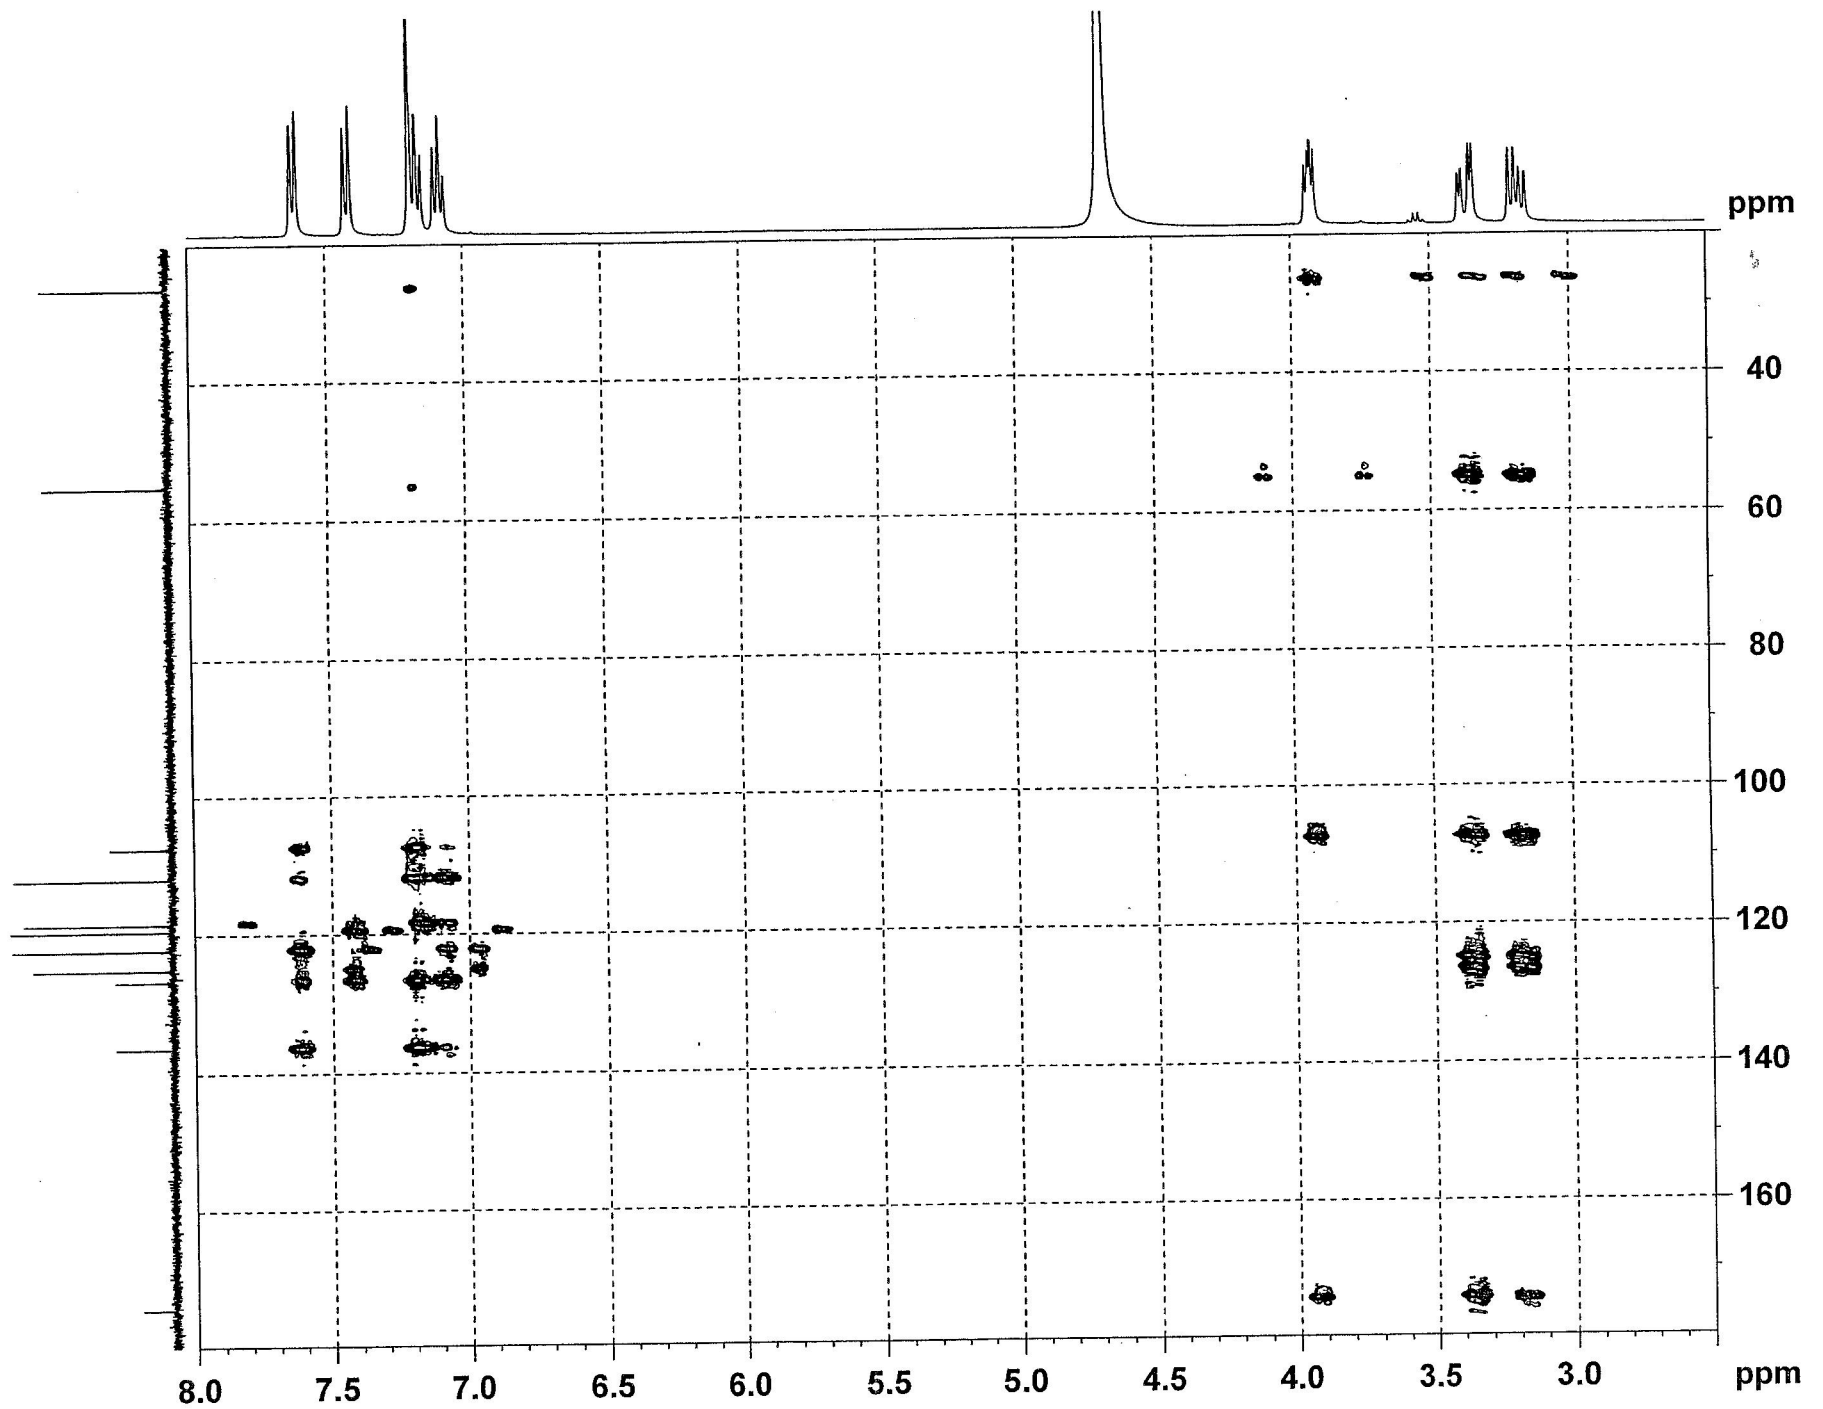

10-10-3 HMQC D2O BRUKER AV400 06,14,2012

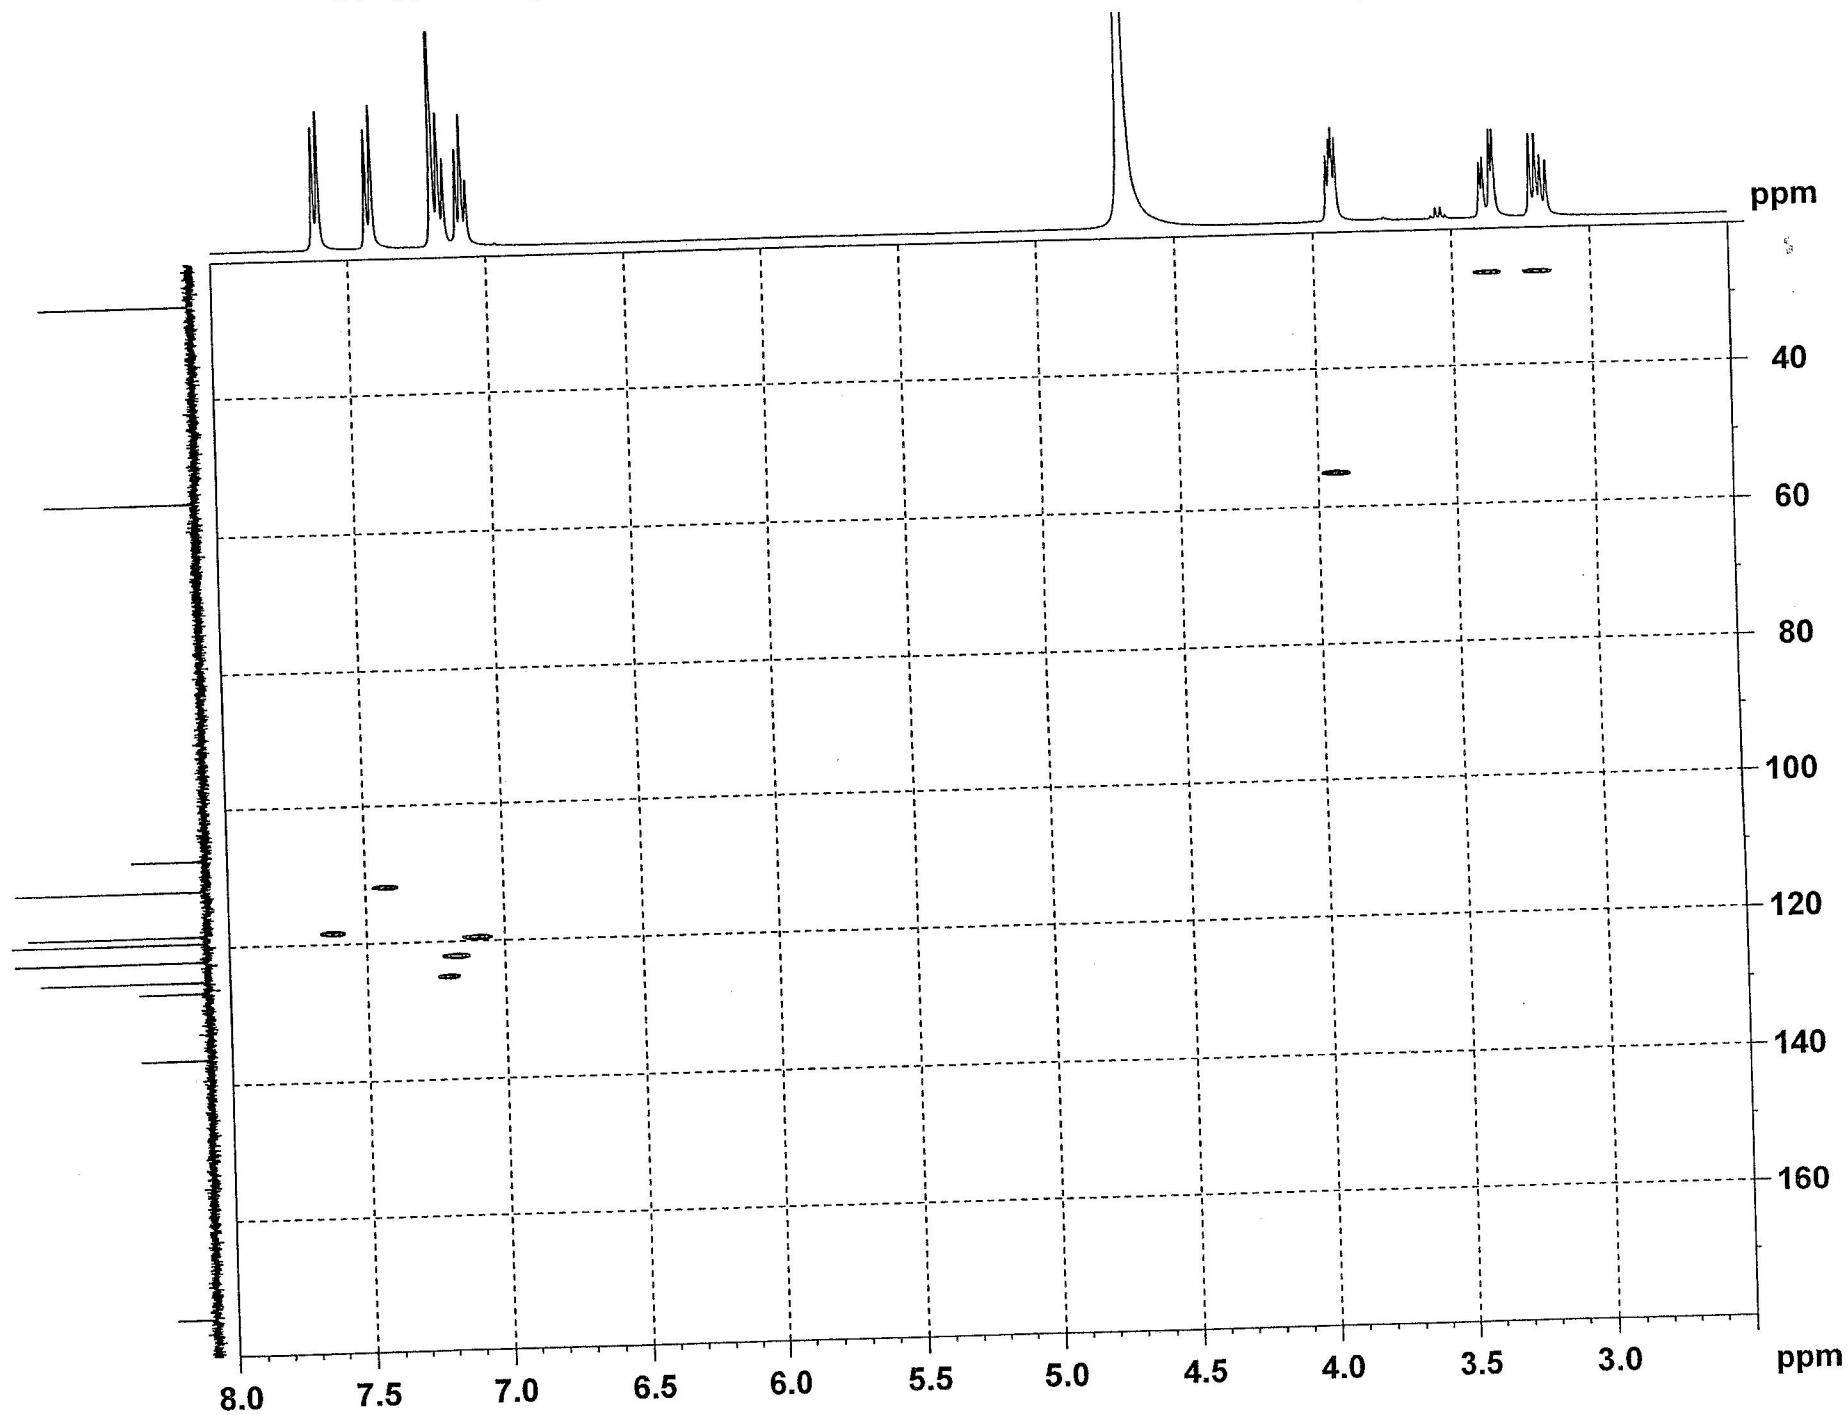

Supplement: c5fo00117j1.pdf [file c5fo00117j1.pdf]
